# Supplementary material for: Roles of marine biota in the formation of atmospheric bioaerosols, cloud condensation nuclei, and ice-nucleating particles over the North Pacific Ocean, Bering Sea, and Arctic Ocean
Source: Copernicus journal article supplement (doi:10.5194/acp-24-1777-2024), 2024-02-08
Supplement: Supplementary file 1 [file acp-24-1777-2024-supplement.pdf]

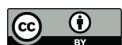

*Supplement of*

**Roles of marine biota in the formation of atmospheric bioaerosols, cloud condensation nuclei, and ice-nucleating particles over the North Pacific Ocean, Bering Sea, and Arctic Ocean**

**Kaori Kawana et al.**

*Correspondence to:* Kaori Kawana ([kawana@iceht.forth.gr](mailto:kawana@iceht.forth.gr)) and Yugo Kanaya ([yugo@jamstec.go.jp](mailto:yugo@jamstec.go.jp))

The copyright of individual parts of the supplement might differ from the article licence.

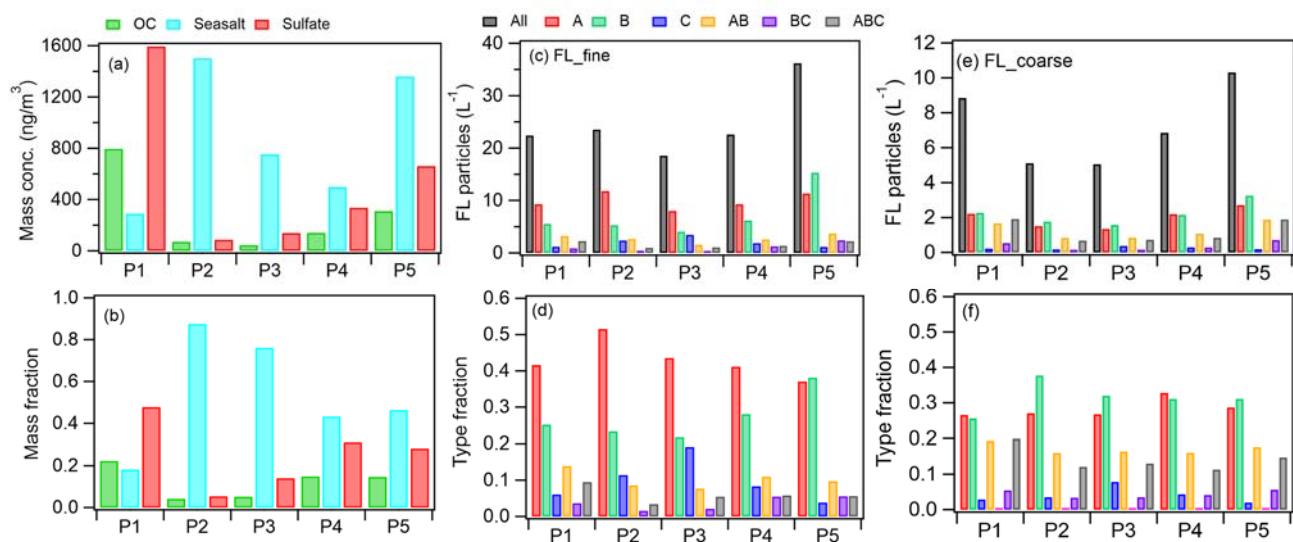

5 **Figure S1.** (a) Mass concentration and (b) mass fraction of chemical components in PM<sub>2.5</sub> aerosol particles in each period. (c) Number concentrations and (d) fractions of types of fluorescent fine particles ( $1 < D_p < 2.5 \mu\text{m}$ ), and (e) and (f) those of fluorescent coarse particles ( $D_p > 2.5 \mu\text{m}$ ).

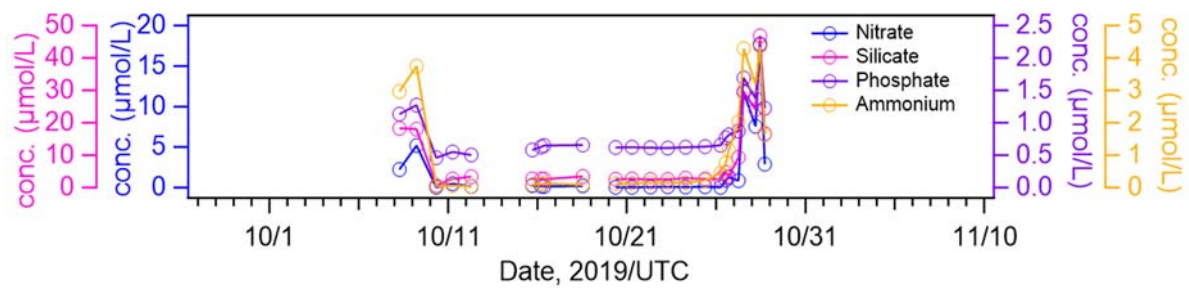

**Figure S2.** Time series of nutrient concentrations in seawater.

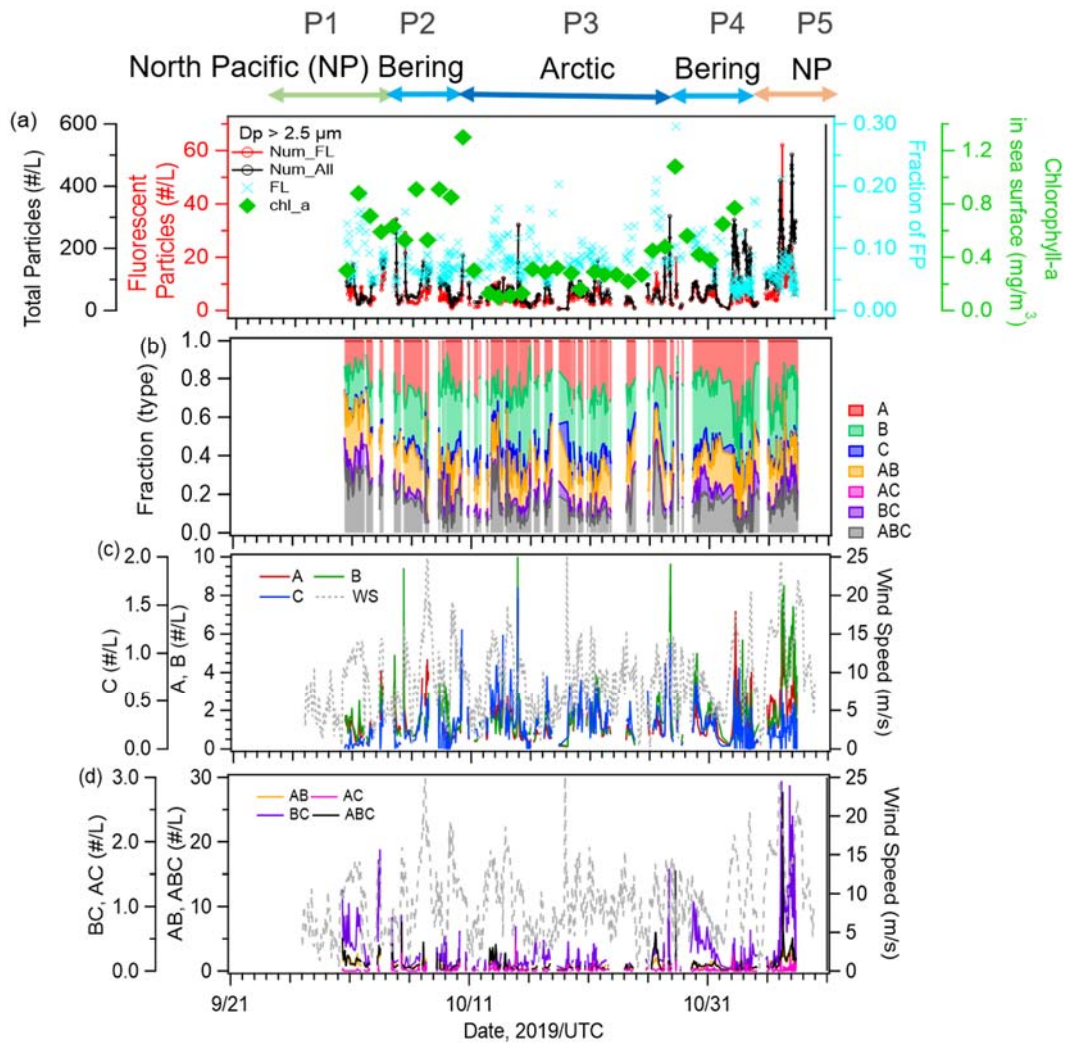

**Figure S3.** (a)–(d) Same as Fig. 4 but for fluorescent particles with diameter of  $>2.5 \mu\text{m}$ .

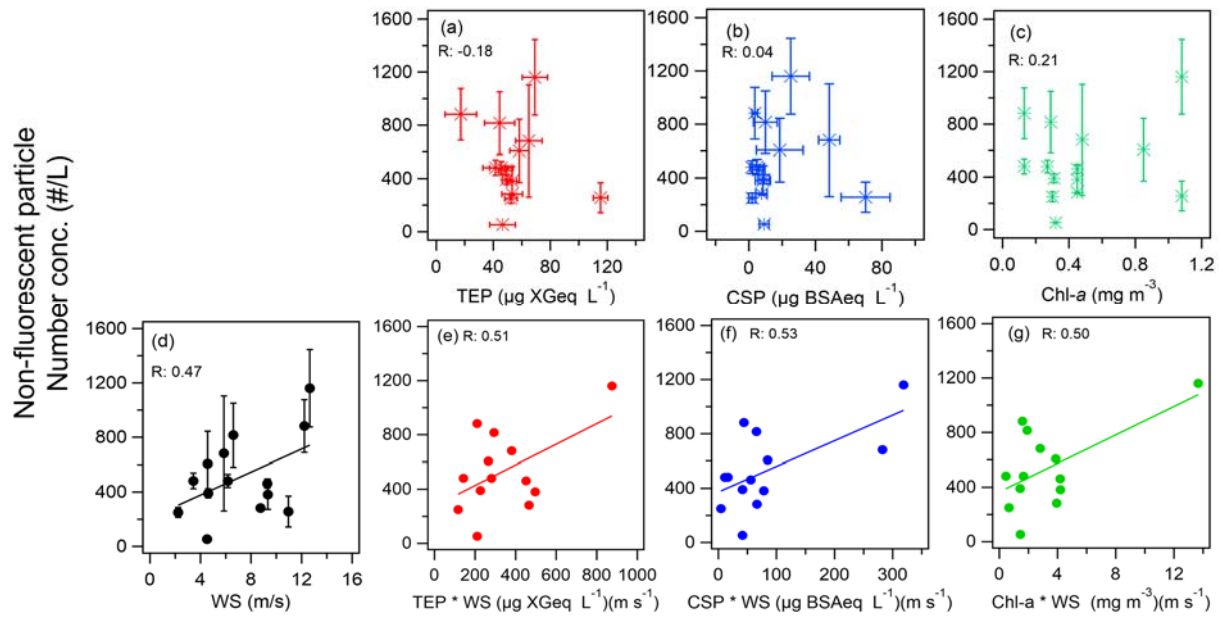

**Figure S4.** Scatterplots of nonfluorescent particles and bioindicators as (a) TEPs, (b) CSPs, and (c) Chl-*a*, and  
 5 scatterplots of nonfluorescent particles and (d) WS, and (e) TEPs, (f) CSPs, and (g) Chl-*a*, multiplied with WS.  
 Colored lines represent the orthogonal regression lines. Error bars represent one standard deviation.

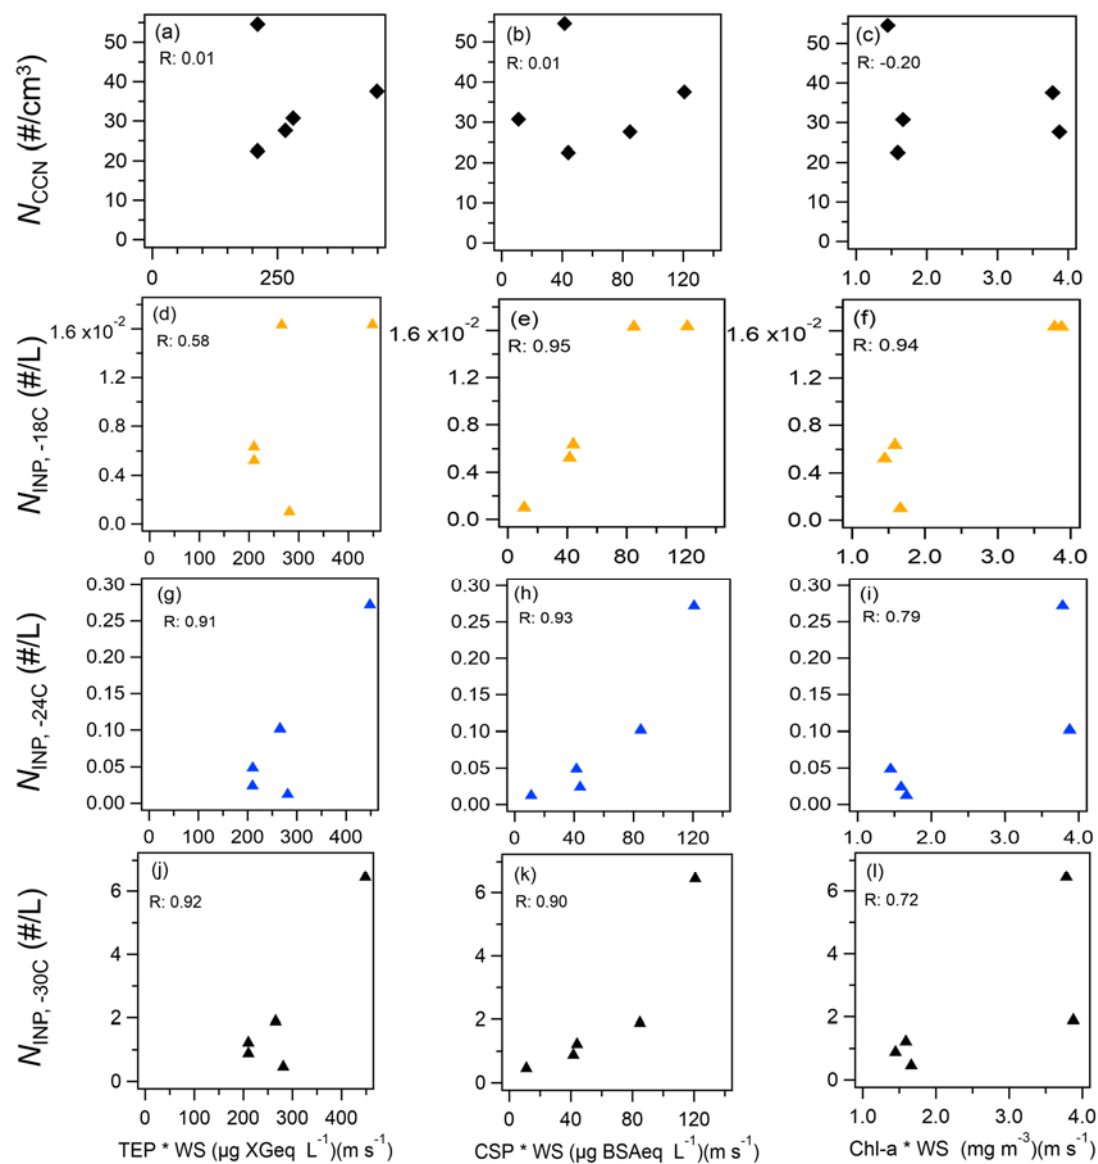

**Figure S5.** (a)–(l) Same as Fig. 7 but with exclusion of the highest data point.
